# Supplementary material for: Antagonistic Effects of Enrofloxacin on Carbendazim-Induced Developmental Toxicity in Zebrafish Embryos
Source: MDPI journal article supplement (doi:10.3390/toxics9120349), 2021-12-10
Supplement: s1 [file s1]

# Supplementary Materials: Antagonistic Effects of Enrofloxacin on Carbendazim-Induced Developmental Toxicity in Zebrafish Embryos

Ruiqi Fan, Wanjun Zhang, Li Jia, Sunlin Luo, Ying Liu, Yongpeng Jin, Yongchen Li, Xiaoyan Yuan and Yiqiang Chen

**Table S1.** Primer pairs of selected genes in qRT-PCR analysis.

| Gene           | Forward Primer            | Reverse Primer             |
|----------------|---------------------------|----------------------------|
| $\beta$ -actin | TCAGTGCACGCTGAGAAGAT      | ATGCCAACCATCACTCCCTGA      |
| <i>pklr</i>    | GGACTCATTCATCCAGAAGCAG    | GCGATGTTTCATTCCTGCTTT      |
| <i>gapdh</i>   | TTTGACGCTGGTGCTGGTAT      | CGTATCAAAAAAAAAAGAAACAGCAA |
| <i>apoa1a</i>  | TATGCCCAGACCACCTCCC       | GGCGGTTTCAGAGCGGAGT        |
| <i>cyp7a1</i>  | CAGGAATACGCAGAAGACATCC    | TTGCCCCAAACTGAAGAGCA       |
| <i>cyp2p9</i>  | GTATCCTGGGATTCAAGCTAAAGTT | TATCCTCTGAAGTAGTCCTGGTCAC  |
| <i>ambp</i>    | GTACGCTCTGGTGGTGATGTTA    | CCGCTGAATCTGTGGCTCT        |
